# Supplementary material for: Genetic basis of human congenital anomalies of the kidney and urinary tract
Source: JCI journal article supplement (doi:10.1172/jci95300), 2018-01-01
Supplement: sd1 [file 1]

| OMIM gene number             | Gene symbol  | OMIM syndrome name                                                                | Biomolecular pathway                                                                                                                                                  | Loss-of-function variant carriers in 60,706 individuals from ExAC database | pLI-score in ExAC database | CAKUT phenotypes                                           | Phenotypic findings                                                                                        | Mode of inheritance |
|------------------------------|--------------|-----------------------------------------------------------------------------------|-----------------------------------------------------------------------------------------------------------------------------------------------------------------------|----------------------------------------------------------------------------|----------------------------|------------------------------------------------------------|------------------------------------------------------------------------------------------------------------|---------------------|
| <b>Transcription factors</b> |              |                                                                                   |                                                                                                                                                                       |                                                                            |                            |                                                            |                                                                                                            |                     |
| *601653                      | <i>EYA1</i>  | Branchio-oto-renal syndrome                                                       | Protein phosphatase required for regulating genes encoding growth control and signaling molecules. Transcriptional co-activator of <i>SIX1</i> .                      | 3                                                                          | 0.96                       | Syndromic RHD                                              | Sensorineural hearing loss, preauricular pits, branchial cysts, microtia                                   | Autosomal Dominant  |
| *605515                      | <i>FOXP1</i> | Mental retardation with language impairment and with or without autistic features | Forkhead box transcription factors play important roles in the regulation of tissue- and cell type-specific gene transcription during both development and adulthood. | 10                                                                         | 1.00                       | (Syndromic) RHD, VUR, duplication of the collecting system | Structural brain abnormalities, seizures, developmental delay, facial dysmorphisms, skeletal abnormalities | Autosomal Dominant  |
| *131320                      | <i>GATA3</i> | Hypoparathyroidism, sensorineural deafness, and renal dysplasia                   | Regulator of T-cell development and plays an important role in endothelial cell biology.                                                                              | 2                                                                          | 0.88                       | RHD                                                        | Hypoparathyroidism, sensorineural deafness, genital malformations                                          | Autosomal Dominant  |
| *165240                      | <i>GLI3</i>  | Pallister-Hall syndrome                                                           | C2H2-type zinc finger proteins subclass of transcription factors that mediate Sonic hedgehog signaling.                                                               | 3                                                                          | 1.00                       | Syndromic RHD                                              | Cardiac malformations, facial dysmorphisms, skeletal abnormalities                                         | Autosomal Dominant  |

|         |              |                                   |                                                                                                                                                                          |    |      |                                                                           |                                                                                                                                                           |                    |
|---------|--------------|-----------------------------------|--------------------------------------------------------------------------------------------------------------------------------------------------------------------------|----|------|---------------------------------------------------------------------------|-----------------------------------------------------------------------------------------------------------------------------------------------------------|--------------------|
| *189907 | <i>HNF1B</i> | Renal cysts and diabetes syndrome | Member of the homeodomain-containing superfamily of transcription factors. Role in nephron and pancreas development.                                                     | 4  | 1.00 | Isolated RHD                                                              | Maturity onset diabetes in the young type 5, hyperuricemia, hypomagnesemia, genital malformations                                                         | Autosomal Dominant |
| *142994 | <i>MNX1</i>  | Currarino syndrome                | Nuclear protein, which contains a homeobox domain and transcription factor                                                                                               | 1  | -    | Syndromic RHD, renal ectopia, VUR                                         | Caudal regression syndrome, anorectal malformations, developmental delay, skeletal abnormalities                                                          | Autosomal Dominant |
| *167409 | <i>PAX2</i>  | Papillorenal syndrome             | Transcription factor factor of paired box domain family. <i>PAX2</i> is believed to be a target of transcriptional suppression by the tumor suppressor gene <i>WT1</i> . | 16 | 0.12 | Isolated RHD                                                              | Retinal and optic nerve coloboma                                                                                                                          | Autosomal Dominant |
| *176310 | <i>PBX1</i>  | Leukemia, acute pre-B-cell        | PBX homeobox family of transcriptional factors. May be involved in the regulation of osteogenesis, and required for skeletal patterning and programming.                 | 3  | 0.91 | Syndromic RHD, VUR, obstructive uropathy, horseshoe kidney, renal ectopia | Deafness, developmental delay, skeletal abnormalities, facial dysmorphisms, 1q23.3-q24.1 deletion syndrome (cardiac defects, genital malformations, spina | Autosomal Dominant |

|         |              |                                                  |                                                                                                                                                       |   |      |                                                              |                                                                                                                          |                    |
|---------|--------------|--------------------------------------------------|-------------------------------------------------------------------------------------------------------------------------------------------------------|---|------|--------------------------------------------------------------|--------------------------------------------------------------------------------------------------------------------------|--------------------|
|         |              |                                                  |                                                                                                                                                       |   |      |                                                              | bifida), leukemia                                                                                                        |                    |
| *604613 | <i>TBX18</i> | Congenital anomalies of kidney and urinary tract | Transcription factor that plays a crucial role in embryonic development. The family is characterized by the presence of the DNA-binding T-box domain. | 1 | 1.00 | Isolated obstructive uropathy, VUR                           | -                                                                                                                        | Autosomal Dominant |
| *602218 | <i>SALL1</i> | Townes-Brocks syndrome                           | Zinc finger transcriptional repressor that may be part of the NuRD histone deacetylase complex (HDAC).                                                | 2 | 0.99 | Syndromic RHD, VUR, renal ectopia, posterior urethral valves | Thumb abnormalities, facial dysmorphisms, gastrointestinal malformations, genital malformations                          | Autosomal Dominant |
| *607343 | <i>SALL4</i> | Duane-radial ray syndrome                        | This gene encodes a zinc finger transcription factor thought to play a role in the development of abducens motor neurons.                             | 7 | 1.00 | Syndromic renal ectopia, CAKUT                               | Radial abnormalities, facial dysmorphisms, sensorineural deafness, gastrointestinal malformations, genital malformations | Autosomal Dominant |
| *601205 | <i>SIX1</i>  | Branchio-oto-renal syndrome                      | Homeobox protein thought to be involved in limb development.                                                                                          | 0 | 0.93 | Syndromic RHD                                                | Sensorineural hearing loss, preauricular pits, branchial cysts, microtia                                                 | Autosomal Dominant |

|                                                 |               |                           |                                                                                                                                                                                                                                     |    |      |                         |                                                                                                                     |                    |
|-------------------------------------------------|---------------|---------------------------|-------------------------------------------------------------------------------------------------------------------------------------------------------------------------------------------------------------------------------------|----|------|-------------------------|---------------------------------------------------------------------------------------------------------------------|--------------------|
| *610928                                         | <i>SOX17</i>  | VUR                       | SOX (SRY-related HMG-box) family-member of transcription factors involved in the regulation of embryonic development and in the determination of the cell fate.                                                                     | 0  | 0.87 | VUR                     | Corpus callosum hypoplasia(?), chronic constipation(?)                                                              | Autosomal Dominant |
| <b>Chromatin binding proteins/DNA helicases</b> |               |                           |                                                                                                                                                                                                                                     |    |      |                         |                                                                                                                     |                    |
| #214800                                         | <i>CHD7</i>   | CHARGE syndrome           | Protein that contains several helicase family domains.                                                                                                                                                                              | 5  | 1.00 | RHD, renal ectopia, VUR | Cardiac malformations, developmental delay, choanal atresia, gastrointestinal malformations, skeletal abnormalities | Autosomal Dominant |
| *600140                                         | <i>CREBBP</i> | Rubinstein-Taybi syndrome | Involved in the transcriptional coactivation of many different transcription factors. Critical role in embryonic development, growth control, and homeostasis by coupling chromatin remodeling to transcription factor recognition. | 46 | 1.00 | Syndromic RHD, VUR      | Developmental delay, facial dysmorphisms, cardiac malformations, skeletal abnormalities                             | Autosomal Dominant |
| *300128                                         | <i>KDM6A</i>  | Kabuki-syndrome           | The encoded protein of this gene contains catalyzes the                                                                                                                                                                             | 2  | 1.00 | Syndromic VUR, RHD,     | Developmental delay, facial dysmorphisms,                                                                           | X-linked           |

|                                           |              |                               |                                                                                                                                                                                                 |    |      |                                                           |                                                                                                                  |                       |
|-------------------------------------------|--------------|-------------------------------|-------------------------------------------------------------------------------------------------------------------------------------------------------------------------------------------------|----|------|-----------------------------------------------------------|------------------------------------------------------------------------------------------------------------------|-----------------------|
|                                           |              |                               | demethylation of tri-<br>/dimethylated histone H3.                                                                                                                                              |    |      | renal ectopia                                             | cardiac<br>malformations,<br>feeding difficulties                                                                | Dominant              |
| *602113                                   | <i>KMT2D</i> | Kabuki-syndrome               | Histone methyltransferase<br>that methylates the Lys-4<br>position of histone H3.                                                                                                               | 21 | 1.00 | Syndromic<br>VUR, RHD,<br>renal ectopia                   | Developmental delay,<br>facial dysmorphisms,<br>cardiac<br>malformations,<br>feeding difficulties                | Autosomal<br>Dominant |
| *608667                                   | <i>NIPBL</i> | Cornelia de Lange<br>syndrome | Encodes protein that<br>facilitates enhancer-promotor<br>communication and serves as<br>chromosomal adherin with<br>roles in chromatid cohesion,<br>chromosomal condensation<br>and DNA repair. | 1  | 1.00 | Syndromic<br>RHD                                          | Intrauterine growth<br>retardation, long<br>curly eyelashes,<br>cardiac<br>malformations,<br>developmental delay | Autosomal<br>Dominant |
| <b>Signaling molecules/Growth factors</b> |              |                               |                                                                                                                                                                                                 |    |      |                                                           |                                                                                                                  |                       |
| *602007                                   | <i>CRKL</i>  | Atypical DiGeorge<br>syndrome | Protein kinase which has<br>been shown to activate the<br>RAS and JUN kinase signaling<br>pathways and transform<br>fibroblasts in a RAS-<br>dependent fashion.                                 | 1  | 0.16 | RHD, VUR,<br>obstructive<br>uropathy                      | Developmental delay,<br>ventricular septum<br>defect, genital<br>malformations                                   | Autosomal<br>Dominant |
| *612666                                   | <i>DSTYK</i> | Spastic paraplegia            | Protein kinase which is<br>expressed in multiple tissues<br>and presumed to function as a<br>regulator of cell death.                                                                           | 39 | 0.15 | Isolated RHD,<br>ureteropelvic<br>junction<br>obstruction | Skin pigment<br>abnormalities<br>(recessive),<br>seizures(?)                                                     | Autosomal<br>Dominant |

|         |              |                                                                              |                                                                                                                                                                                                                                              |             |      |                                                                              |                                                                                          |                                           |
|---------|--------------|------------------------------------------------------------------------------|----------------------------------------------------------------------------------------------------------------------------------------------------------------------------------------------------------------------------------------------|-------------|------|------------------------------------------------------------------------------|------------------------------------------------------------------------------------------|-------------------------------------------|
| *605558 | <i>FGF20</i> | Renal hypodysplasia/aplasia                                                  | Fibroblast growth factors possess broad mitogenic and cell survival activities, and are involved in a variety of biological processes including embryonic development, cell growth, morphogenesis, tissue repair, tumor growth and invasion. | 1 (0 hom)   | 0.70 | Isolated RHD (Bilateral)                                                     | Varus feet, pulmonary hypoplasia, skin abnormalities                                     | Autosomal Recessive                       |
| *136350 | <i>FGFR1</i> | Hypogonadotropic hypogonadism with or without anosmia                        | Member of the fibroblast growth factor receptor family. Signaling molecule that influences mitogenesis and differentiation.                                                                                                                  | 12          | 0.99 | RHD, obstructive uropathy                                                    | Hyposmia/anosmia, genital malformations, skeletal malformations, endocrine abnormalities | Autosomal dominant                        |
| *607830 | <i>FRAS1</i> | Fraser syndrome (homozygous loss-of-function variants)                       | Extracellular matrix protein with function in the regulation of epidermal-basement membrane adhesion and organogenesis during development.                                                                                                   | 145 (0 hom) | 0.00 | RHD, VUR, duplication of the collecting system, posterior urethral valves(?) | Facial dysmorphisms, developmental delay, genital malformations                          | Autosomal Recessive (hypomorphic alleles) |
| *608944 | <i>FREM1</i> | Bifid nose with or without anorectal and renal anomalies (Fraser-associated) | Basement membrane protein that plays a role in craniofacial and renal development.                                                                                                                                                           | 89 (1 hom)  | -    | RHD, VUR, duplication of the collecting system, posterior urethral           | Bifid nose, developmental delay, gastrointestinal malformations, genital                 | Autosomal Recessive (hypomorphic alleles) |

|         |              |                                                        |                                                                                                                                                                                                             |            |      |                                                                              |                                                                                                                |                                           |
|---------|--------------|--------------------------------------------------------|-------------------------------------------------------------------------------------------------------------------------------------------------------------------------------------------------------------|------------|------|------------------------------------------------------------------------------|----------------------------------------------------------------------------------------------------------------|-------------------------------------------|
|         |              |                                                        |                                                                                                                                                                                                             |            |      | valves(?)                                                                    | malformations                                                                                                  |                                           |
| *608945 | <i>FREM2</i> | Fraser syndrome (homozygous loss-of-function variants) | Integral membrane protein localized to the basement membrane that plays a role in epidermal-dermal interactions.                                                                                            | 63 (0 hom) | 0.00 | RHD, VUR, duplication of the collecting system, posterior urethral valves(?) | Facial dysmorphisms, developmental delay, genital malformations                                                | Autosomal Recessive (hypomorphic alleles) |
| *605710 | <i>GDNF</i>  | Hirschsprung disease                                   | Member of transforming growth factor-beta superfamily of proteins. Encodes a neurotrophic factor that promotes survival and differentiation and regulates apoptosis. Ligand for the product of <i>RET</i> . | 8          | 0.70 | Isolated RHD                                                                 | Absent enteric ganglia, pheochromocytoma, central hypoventilation syndrome                                     | Autosomal Dominant                        |
| *300037 | <i>GPC3</i>  | Simpson-Golabi-Behmel syndrome                         | Bind to and inhibit the dipeptidyl peptidase activity of CD26, inducing apoptosis in certain cell types.                                                                                                    | 0 (0 hemi) | 0.99 | Syndromic RHD, cysts, VUR                                                    | Facial dysmorphisms, developmental delay, cardiac malformations, genital malformations, skeletal abnormalities | X-linked Recessive                        |
| *613469 | <i>HPSE2</i> | Urofacial syndrome                                     | Endoglycosidase that degrades heparin sulfate proteoglycans on the                                                                                                                                          | 44 (0 hom) | 0.00 | Bladder dysfunction,                                                         | Abnormal facial expression upon                                                                                | Autosomal Recessive                       |

|         |               |                                                                           |                                                                                                                                          |            |      |                           |                                                                                               |                     |
|---------|---------------|---------------------------------------------------------------------------|------------------------------------------------------------------------------------------------------------------------------------------|------------|------|---------------------------|-----------------------------------------------------------------------------------------------|---------------------|
|         |               |                                                                           | extracellular matrix and cell surface. Involved in biological processes such as remodeling of the extracellular matrix and angiogenesis. |            |      | VUR                       | smiling and crying                                                                            |                     |
| +601290 | <i>JAG1</i>   | Alagille syndrome                                                         | Human jagged 1 is the ligand for the receptor notch 1.                                                                                   | 1          | 1.00 | RHD, cysts                | Facial dysmorphisms, cardiac malformations, cholestatic liver disease, skeletal abnormalities | Autosomal Dominant  |
| *300836 | <i>KAL1</i>   | Hypogonadotropic hypogonadism with or without anosmia (Kallmann syndrome) | Similar in sequence to proteins that function in neural cell adhesion and axonal migration. May have anti-protease activity.             | 4 (2 hemi) | 0.94 | RHD, obstructive uropathy | Hyposmia/anosmia, genital malformations, skeletal malformations, endocrine abnormalities      | X-linked Recessive  |
| *608869 | <i>LRIG2</i>  | Urofacial syndrome                                                        | Transmembrane protein that promotes epidermal growth factor signaling and increased proliferation.                                       | 65 (0 hom) | 0.00 | Bladder dysfunction, VUR  | Abnormal facial expression upon smiling and crying                                            | Autosomal Recessive |
| *600275 | <i>NOTCH2</i> | Alagille syndrome                                                         | Notch family members play a role in a variety of developmental processes by controlling cell fate decisions. Regulates interactions      | 7          | 1.00 | RHD, cysts                | Facial dysmorphisms, cardiac malformations, cholestatic liver                                 | Autosomal Dominant  |



|         |               |                                                       |                                                                                                                                  |   |      |                                            |                                                                                          |                    |
|---------|---------------|-------------------------------------------------------|----------------------------------------------------------------------------------------------------------------------------------|---|------|--------------------------------------------|------------------------------------------------------------------------------------------|--------------------|
|         |               |                                                       | between physically adjacent cells.                                                                                               |   |      |                                            | disease, skeletal abnormalities                                                          |                    |
| *603961 | <i>SEMA3A</i> | Hypogonadotropic hypogonadism with or without anosmia | Secreted protein that stimulates the outgrowth of apical dendrites. Plays role in normal neuronal pattern development.           | 6 | 0.99 | RHD, obstructive uropathy                  | Hyposmia/anosmia, genital malformations, skeletal malformations, endocrine abnormalities | Autosomal dominant |
| *191830 | <i>RET</i>    | Hirschsprung disease                                  | Member of the cadherin superfamily, cell-surface tyrosine kinase receptor that is implicated in cell growth and differentiation. | 2 | 1.00 | Syndromic RHD                              | Absent enteric ganglia, multiple endocrine neoplasia, central hypoventilation syndrome   | Autosomal Dominant |
| *602431 | <i>ROBO2</i>  | VUR                                                   | Transmembrane receptor for the slit homolog 2 protein that functions in axon guidance and cell migration.                        | 6 | 1.00 | Isolated VUR(?), RHD, obstructive uropathy | -                                                                                        | Autosomal Dominant |
| *603746 | <i>SLIT2</i>  | -                                                     | Encodes a secreted glycoprotein that is a ligand for the ROBO receptor family; potential role in cell migration.                 | 8 | 1.00 | Isolated RHD, cysts                        | -                                                                                        | Autosomal Dominant |

|                                 |               |                                        |                                                                                                                                         |             |      |                              |                                                |                     |
|---------------------------------|---------------|----------------------------------------|-----------------------------------------------------------------------------------------------------------------------------------------|-------------|------|------------------------------|------------------------------------------------|---------------------|
| *610132                         | <i>VANGL1</i> | Neural tube defects                    | Involved in mediating intestinal trefoil factor during wound healing in the intestinal mucosa.                                          | 6           | 0.53 | Syndromic RHD, renal ectopia | Caudal regression syndrome                     | Autosomal Dominant  |
| *603490                         | <i>WNT4</i>   | Mullerian aplasia and hyperandrogenism | Signaling protein implicated in several developmental processes, including regulation of cell fate and patterning during embryogenesis. | 10          | 0.15 | Isolated RHD, renal ectopia  | Genital malformations, endocrine abnormalities | Autosomal Dominant  |
| <b>Renin-angiotensin system</b> |               |                                        |                                                                                                                                         |             |      |                              |                                                |                     |
| +106180                         | <i>ACE</i>    | Renal tubular dysgenesis               | Enzyme involved in catalyzing the conversion of angiotensin I into angiotensin II.                                                      | 127 (0 hom) | 0.00 | Renal tubular dysgenesis     | Pulmonary hypoplasia, facial dysmorphisms      | Autosomal Recessive |
| +106150                         | <i>AGT</i>    | Renal tubular dysgenesis               | Pre-angiotensinogen or angiotensinogen precursor, cleaved by renin in response to lowered blood pressure.                               | 23 (0 hom)  | 0.00 | Renal tubular dysgenesis     | Pulmonary hypoplasia, facial dysmorphisms      | Autosomal Recessive |
| *106165                         | <i>AGTR1</i>  | Renal tubular dysgenesis               | This gene encodes the angiotensin II type 1 receptor that mediates the major cardiovascular effects of                                  | 16 (0 hom)  | 0.01 | Renal tubular dysgenesis     | Pulmonary hypoplasia, facial dysmorphisms      | Autosomal Recessive |

|                   |               |                          |                                                                                                                                                                    |            |      |                                                             |                                                        |                     |
|-------------------|---------------|--------------------------|--------------------------------------------------------------------------------------------------------------------------------------------------------------------|------------|------|-------------------------------------------------------------|--------------------------------------------------------|---------------------|
|                   |               |                          | angiotensin II.                                                                                                                                                    |            |      |                                                             |                                                        |                     |
| *179820           | <i>REN</i>    | Renal tubular dysgenesis | Aspartyl protease that cleaves angiotensinogen to form angiotensin I.                                                                                              | 27 (0 hom) | 0.01 | Renal tubular dysgenesis                                    | Pulmonary hypoplasia, facial dysmorphisms              | Autosomal Recessive |
| <b>G-proteins</b> |               |                          |                                                                                                                                                                    |            |      |                                                             |                                                        |                     |
| *118494           | <i>CHRM3</i>  | Prune Belly syndrome     | Muscarinic cholinergic receptors that binds acetylcholine leading to adenylate cyclase inhibition, phosphoinositide degeneration, and potassium channel mediation. | 0          | 0.94 | Bilateral megaureters, RHD                                  | Abdominal wall abnormalities, bilateral cryptorchidism | Autosomal Recessive |
| *609850           | <i>TBC1D1</i> | -                        | Member of TBC protein family presumed to have a role in regulating cell growth and differentiation.                                                                | 54         | 0.00 | RHD, obstructive uropathy, cysts, VUR                       | Insulin resistance                                     | Autosomal Dominant  |
| *606523           | <i>SRGAP1</i> | -                        | GTPase activator, working with the GTPase CDC42 to negatively regulate neuronal migration. Interacts with ROBO1.                                                   | 16         | 0.99 | RHD, duplication of the collecting system, horseshoe kidney | Cleft palate, developmental delay(?)                   | Autosomal Dominant  |

| Other/unknown |               |                            |                                                                                                                           |             |      |                           |                                                                                                                                 |                     |
|---------------|---------------|----------------------------|---------------------------------------------------------------------------------------------------------------------------|-------------|------|---------------------------|---------------------------------------------------------------------------------------------------------------------------------|---------------------|
| *602858       | <i>DHCR7</i>  | Smith-Lemli-Opitz syndrome | Enzyme that alters the chemical structure of sterols and catalyzes the conversion of 7-dehydrocholesterol to cholesterol. | 520 (0 hom) | 0.00 | Syndromic RHD, cysts, VUR | Low cholesterol, facial dysmorphisms, developmental delay, cardiac malformations, genital malformations, skeletal abnormalities | Autosomal Recessive |
| -pending      | <i>GREB1L</i> | -                          | Role in <i>hoxb1</i> and <i>shha</i> signaling in zebrafish, co-factor in retinoid acid and steroid signaling.            | -           | -    | RHD                       | -                                                                                                                               | Autosomal dominant  |

|         |              |   |                                                                                                                                                                   |            |      |                          |                                                                                                                                                                 |                     |
|---------|--------------|---|-------------------------------------------------------------------------------------------------------------------------------------------------------------------|------------|------|--------------------------|-----------------------------------------------------------------------------------------------------------------------------------------------------------------|---------------------|
| *602490 | <i>NRIP1</i> | - | Nuclear protein that interacts with hormone-dependent activation of nuclear receptors.                                                                            | 2          | 0.99 | RHD, VUR, ectopic kidney | -                                                                                                                                                               | Autosomal Dominant  |
| *606219 | <i>TRAP1</i> | - | Heat shock protein 90 family member and mitochondrial chaperone protein. The encoded protein has ATPase activity and interacts with tumor necrosis factor type I. | 94 (0 hom) | 0.00 | Syndromic RHD, VUR       | Vertebral anomalies, anorectal malformations, cardiovascular disease, tracheoesophageal fistula, esophageal atresia, renal anomalies and limb defects (VACTERL) | Autosomal Recessive |

**Supplemental Table 1. Monogenic forms of CAKUT with depleted loss of function variants in population controls.**

Overview of single-gene causes of isolated and syndromic forms of CAKUT. The presented genes have a loss-of-function variant frequency of <1:1,000 in the Exome Aggregation Consortium database(150) (URL: <http://exac.broadinstitute.org>) for autosomal dominant traits, or, in case of autosomal recessive/X-linked CAKUT, homozygous loss of function variants are depleted. The pLI-score is a probability score that a gene is intolerant to a loss of function mutation (i.e. higher score is less tolerant). Biomolecular pathway description is based on the NCBI gene repository (<https://www.ncbi.nlm.nih.gov/gene>). Gene number, syndrome names and phenotypic findings were extracted from the Online Mendelian Inheritance in Man (OMIM) database (<https://www.omim.org>). (?) = evidence inconclusive; CHARGE = coloboma of the eye, heart defects, atresia of the nasal choanae, retardation of growth and/or development, genital and/or urinary abnormalities, and ear abnormalities and deafness; ExAC = Exome Aggregation Consortium; pLI = probability of being loss-of-function in tolerant; RHD = renal hypodysplasia; VUR = vesicoureteral reflux
